# Supplementary material for: Scaffold and Structural Diversity of the Secondary Metabolite Space of Medicinal Fungi
Source: PubMed Central journal article supplement (PMC9878629; doi:10.1021/acsomega.2c06428), 2023-01-10
Supplement: ao2c06428_si_001.pdf [file ao2c06428_si_001.pdf]

**Supporting Information**  
**Figures S1-S7**  
**for**  
**Scaffold and structural diversity of the secondary metabolite**  
**space of medicinal fungi**

R.P. Vivek-Ananth<sup>a,b</sup>, Ajaya Kumar Sahoo<sup>a,b</sup>, Shanmuga Priya Baskaran<sup>a,b</sup>, Areejit Samal<sup>a,b,\*</sup>

<sup>a</sup> *The Institute of Mathematical Sciences (IMSc), Chennai 600113, India*

<sup>b</sup> *Homi Bhabha National Institute (HBNI), Mumbai 400094, India*

\* To whom correspondence should be addressed: [asamal@imsc.res.in](mailto:asamal@imsc.res.in)

(a)

MeFSAT  
Medicinal Fungi Secondary metabolites And Therapeutics

Home Basic search Advanced search Statistics Acknowledgement Download Help

ADVANCED SEARCH

Physicochemical filter Drug-like filter Chemical similarity filter Scaffold filter

Select Molecular scaffold type to filter secondary metabolites:

- Graph/Node/Bond level for a chemical has connectivity, element, and bond information
- Graph/Node level for a chemical has connectivity and element information but ignores bond information
- Graph level has connectivity information but ignores element and bond information

Graph/Node/Bond Graph/Node Graph

Choose scaffold

Choose from dropdown

Search

(b)

MeFSAT  
Medicinal Fungi Secondary metabolites And Therapeutics

Home Basic search Advanced search Statistics Acknowledgement Download Help

Secondary metabolite: Antcin C

Summary Physicochemical properties Drug-likeness properties ADMET properties Descriptors

Summary

Molecular formula: C<sub>29</sub>H<sub>42</sub>O<sub>5</sub>

SMILES: CC(C)=C(CC)C@H]1[C@@H]1CC[C@@H]2[C@@]1(C)CC(=O)C1=C2[C@@H](O)C[C@@H]2[C@@]1(C)CCC(=O)[C@@H]2C(C)=O

InChI: InChI=1S/C29H42O5/e1-15(17(3)27(33)34)7-8-16(2)19-9-10-20-25-23(31)13-21-18(4)22(30)11-12-28(2)5)26(25)24(3)14-29(19,20)6/h16-21,23,31H,1,7-14H2,2-6H3, (H,33,34)/t16-17,18+19-20+21+23+28+29-m/1s1

InChIKey: TWISSXUVVGIUBP-FNSKOMQISA-N

Molecular scaffolds

Scaffold Graph/Node/Bond level:  
O=C1CCC2C3=C(C)CC2C1)C1CCCC1CC3=O

Scaffold Graph/Node level:  
OC1CCC2C(C)CC3C4CCCC4CC(O)C23)C1

Scaffold Graph level:  
CC1CCC2C(C)CC3C4CCCC4CC(C)C23)C1

**Figure S1:** Screenshots of the (a) Scaffold filter tab under the Advanced Search option in the updated MeFSAT database to filter secondary metabolites by selecting scaffolds of interest, and (b) the detailed information page for a secondary metabolite in the updated MeFSAT database displaying the identified scaffolds for the secondary metabolite.

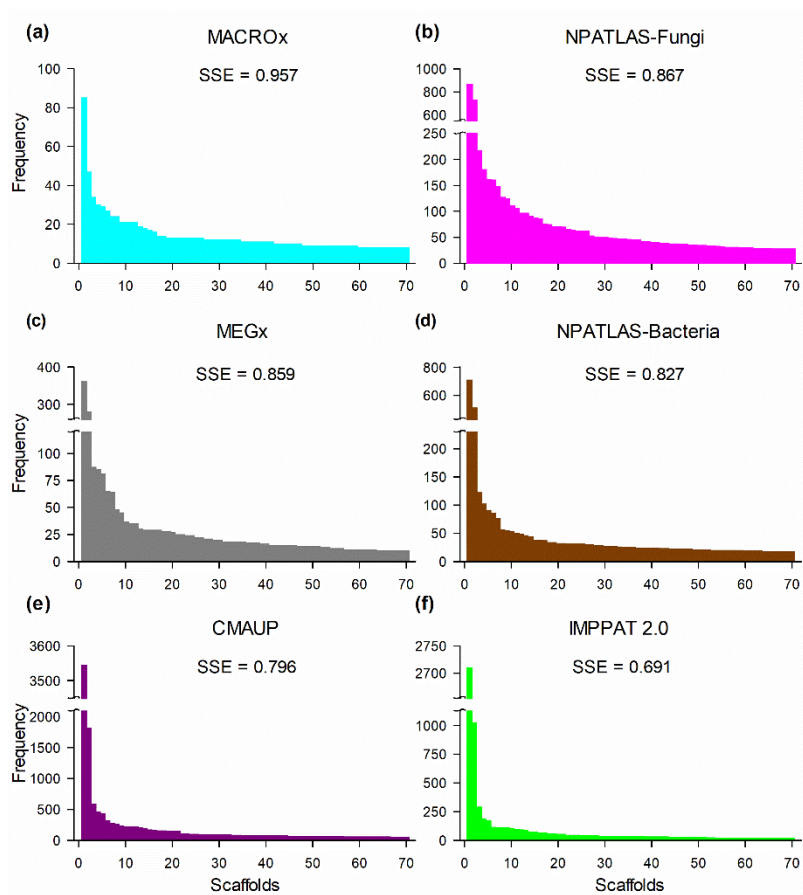

**Figure S2:** Distribution of chemicals across the top 70 most populated scaffolds in libraries: (a) MACROx, (b) NPATLAS-Fungi, (c) MEGx, (d) NPATLAS-Bacteria, (e) CMAUP, and (f) IMPPAT 2.0.

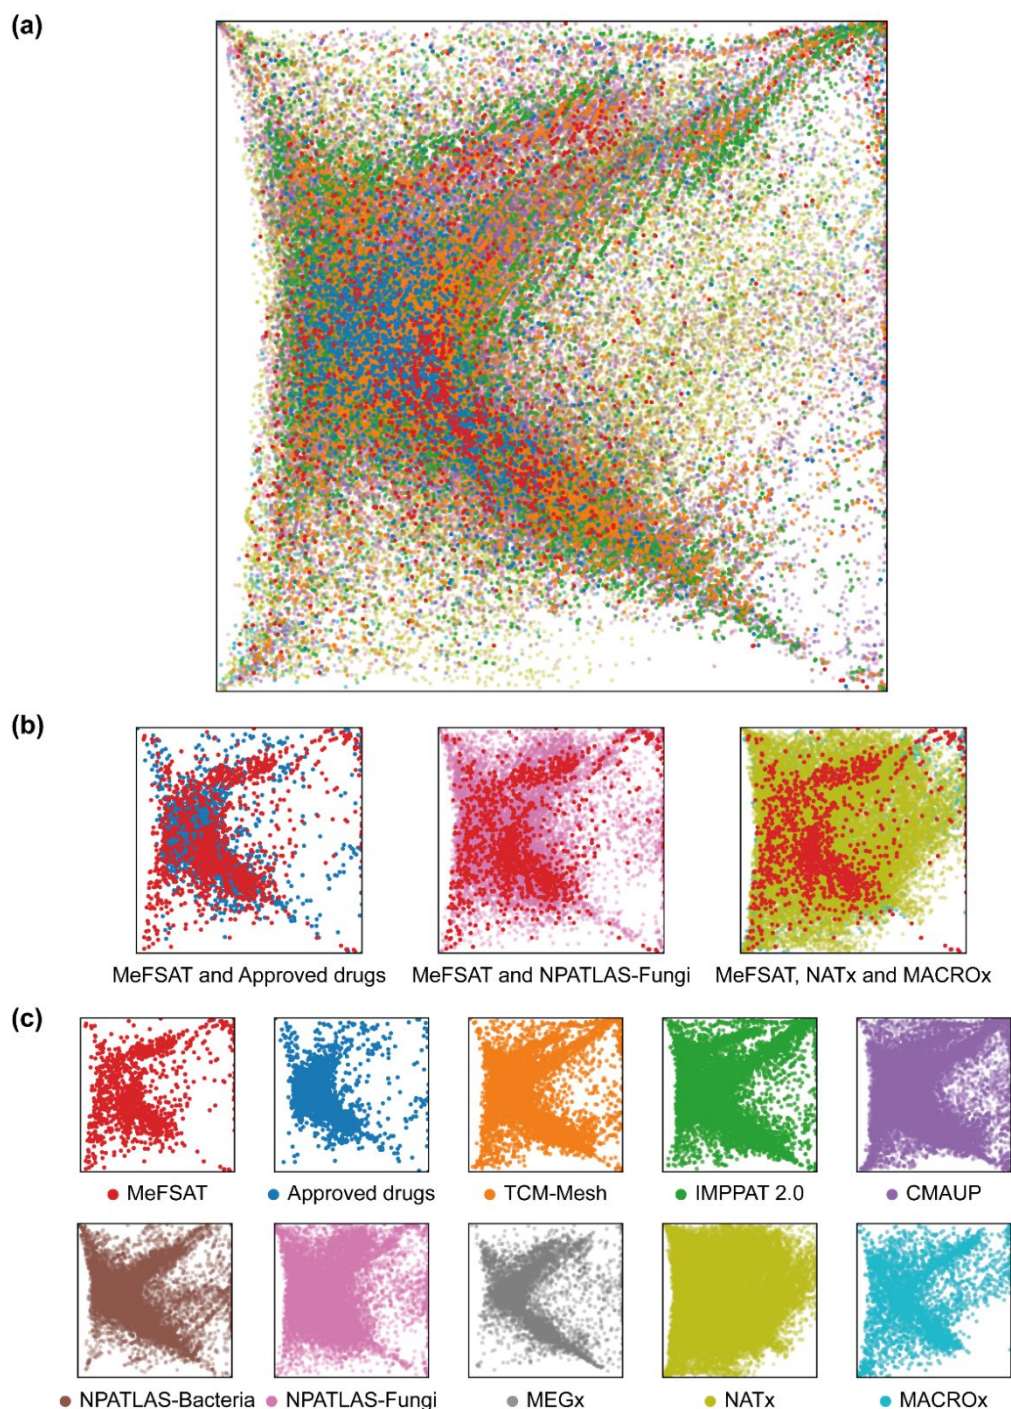

**Figure S3:** Visualization of the chemical spaces generated via GTM using molecular properties for the libraries analysed here. (a) Visualization of all chemical libraries analysed here. (b) Visualization of MeFSAT and Approved drugs, MeFSAT and NPATLAS-Fungi, and MeFSAT, NATx and MACROx. (c) Visualization of each individual chemical library. The colour used to represent each chemical library in the visualization is provided in part (c) along with the corresponding library name.

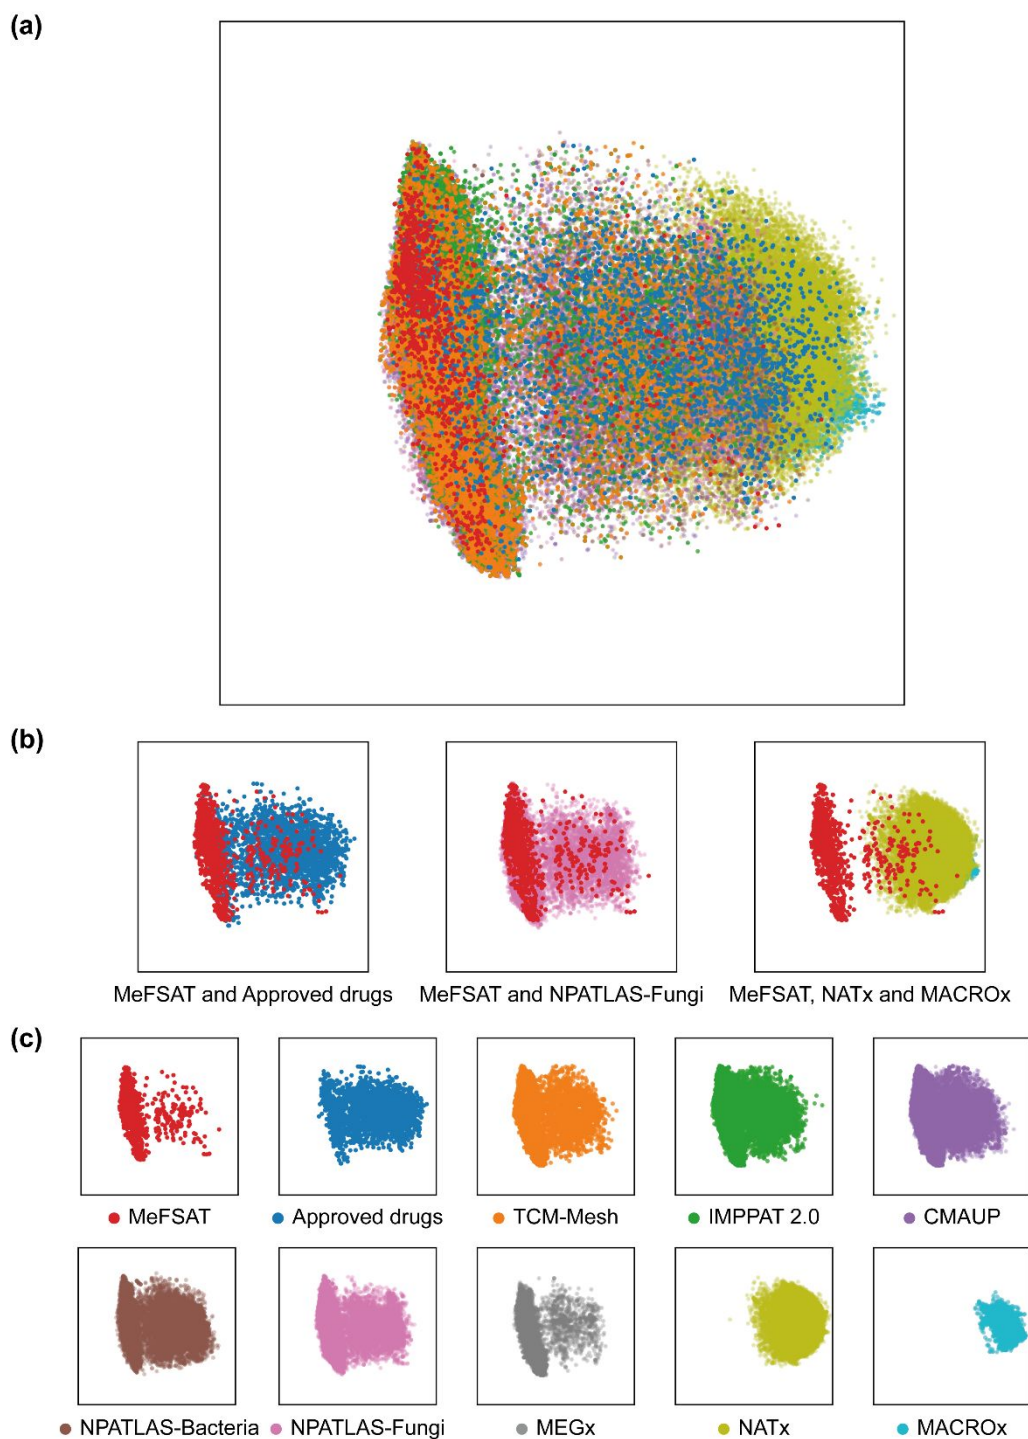

**Figure S4:** Visualization of the chemical spaces generated via PCA using MACCS keys structural fingerprints for the libraries analysed here. (a) Visualization of all chemical libraries analysed here. (b) Visualization of MeFSAT and Approved drugs, MeFSAT and NPATLAS-Fungi, and MeFSAT, NATx and MACROx. (c) Visualization of each individual chemical library. The colour used to represent each chemical library in the visualization is provided in part (c) along with the corresponding library name.



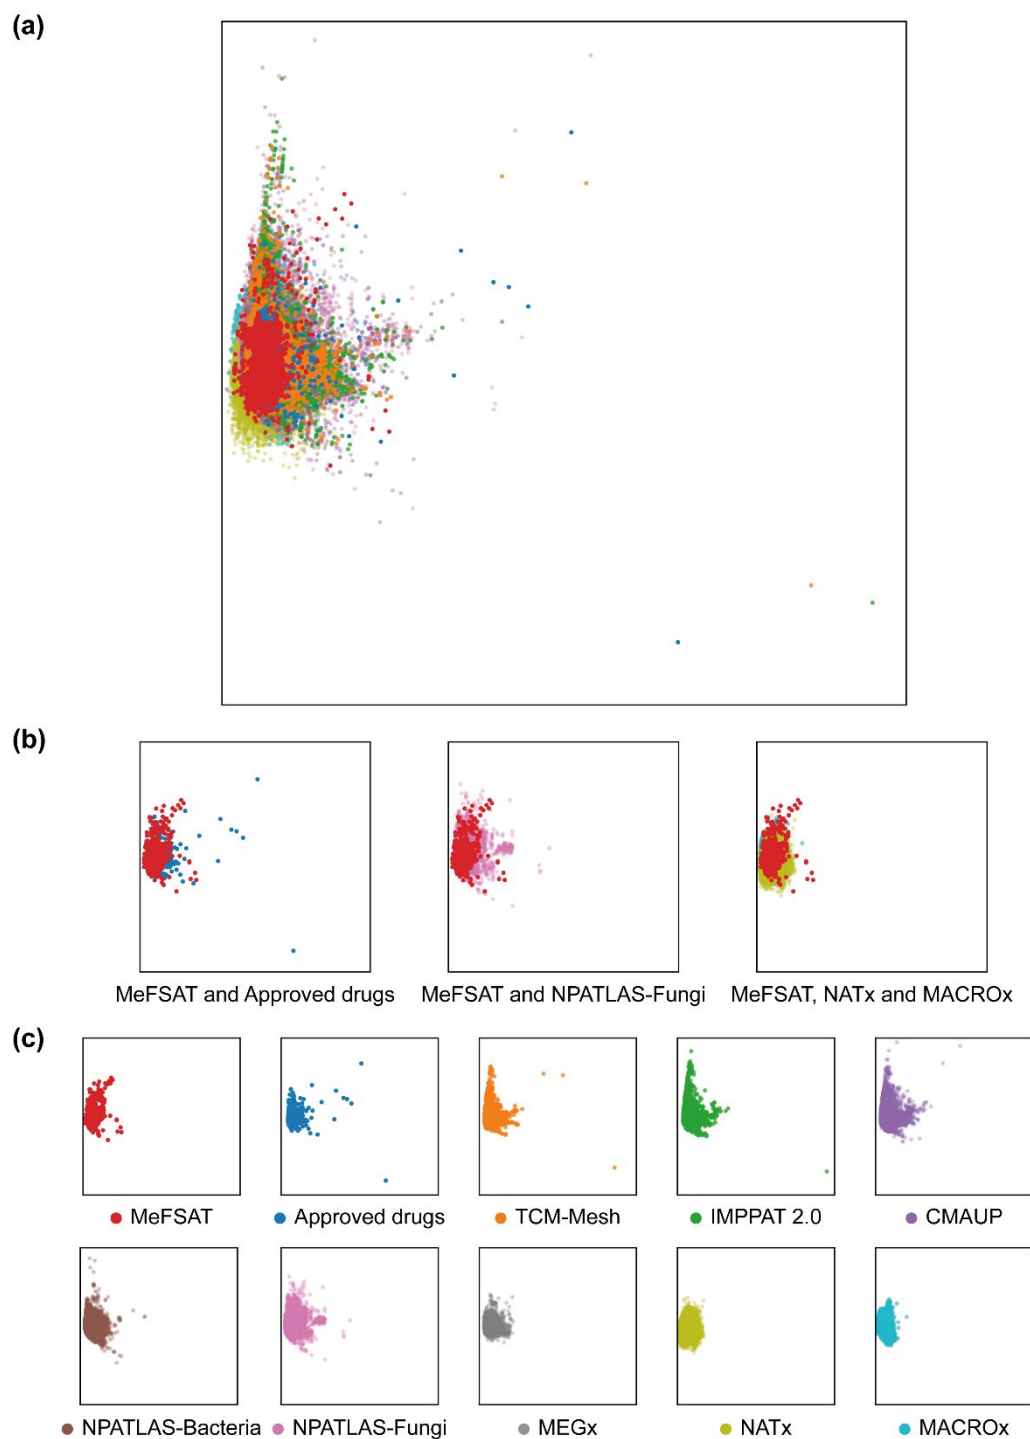

**Figure S5:** Visualization of the chemical spaces generated via PCA using molecular properties for the libraries analysed here. (a) Visualization of all chemical libraries analysed here. (b) Visualization of MeFSAT and Approved drugs, MeFSAT and NPATLAS-Fungi, and MeFSAT, NATx and MACROx. (c) Visualization of each individual chemical library. The colour used to represent each chemical library in the visualization is provided in part (c) along with the corresponding library name.

|                         |      |     |      |      |      |    |     |    |    |    |
|-------------------------|------|-----|------|------|------|----|-----|----|----|----|
| <b>MeFSAT</b>           | NA   |     |      |      |      |    |     |    |    |    |
| <b>Approved drugs</b>   | 8    | NA  |      |      |      |    |     |    |    |    |
| <b>TCM-Mesh</b>         | 82   | 181 | NA   |      |      |    |     |    |    |    |
| <b>IMPPAT 2.0</b>       | 80   | 175 | 3423 | NA   |      |    |     |    |    |    |
| <b>CMAUP</b>            | 130  | 248 | 5945 | 6703 | NA   |    |     |    |    |    |
| <b>NPATLAS-Bacteria</b> | 5    | 19  | 50   | 112  | 184  | NA |     |    |    |    |
| <b>NPATLAS-Fungi</b>    | 1202 | 10  | 102  | 121  | 451  | 2  | NA  |    |    |    |
| <b>MEGx</b>             | 26   | 43  | 499  | 703  | 1058 | 59 | 199 | NA |    |    |
| <b>NATx</b>             | 0    | 0   | 0    | 0    | 0    | 0  | 0   | 0  | NA |    |
| <b>MACROx</b>           | 0    | 0   | 0    | 0    | 0    | 0  | 0   | 0  | 0  | NA |

**MeFSAT**   **Approved drugs**   **TCM-Mesh**   **IMPPAT 2.0**   **CMAUP**   **NPATLAS-Bacteria**   **NPATLAS-Fungi**   **MEGx**   **NATx**   **MACROx**

**Figure S6:** Compound overlap between the chemical libraries analysed in this study. The triangular matrix provides the number of compounds common between different pairs of chemical libraries.

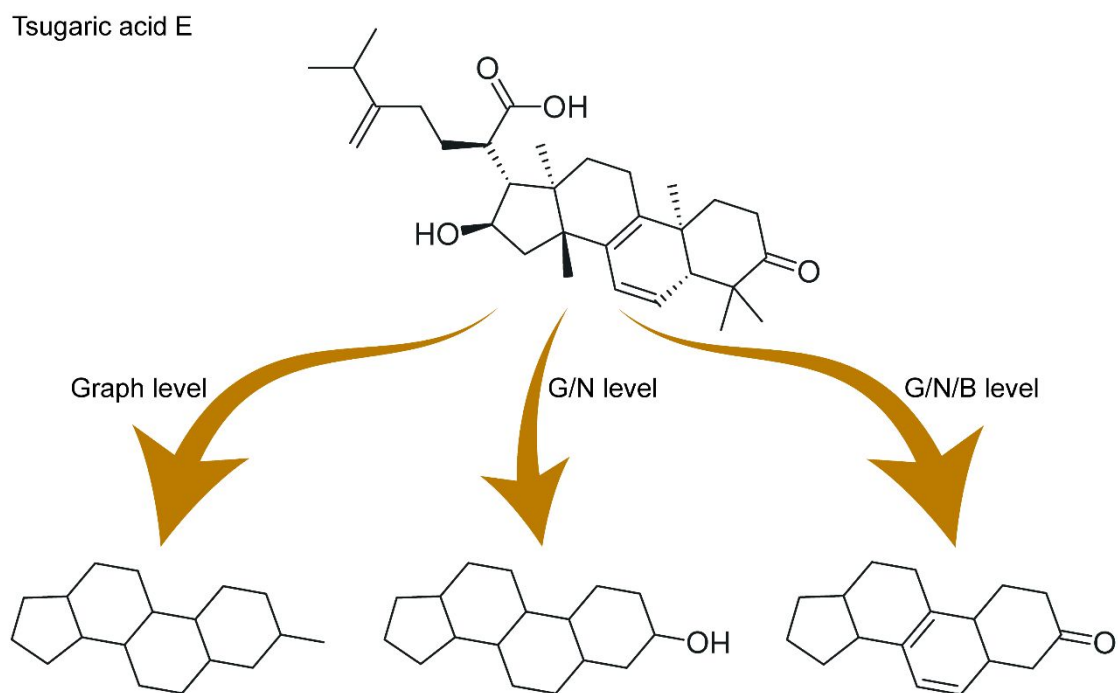

**Figure S7:** Molecular scaffold of the secondary metabolite Tsugaric acid E at three different levels: graph/node/bond (G/N/B) level (with connectivity, element and bond information), graph/node (G/N) level (with both connectivity and element information) and graph level (with only connectivity information).
